# Supplementary material
Source: PubMed Central journal article supplement (PMC3690761)

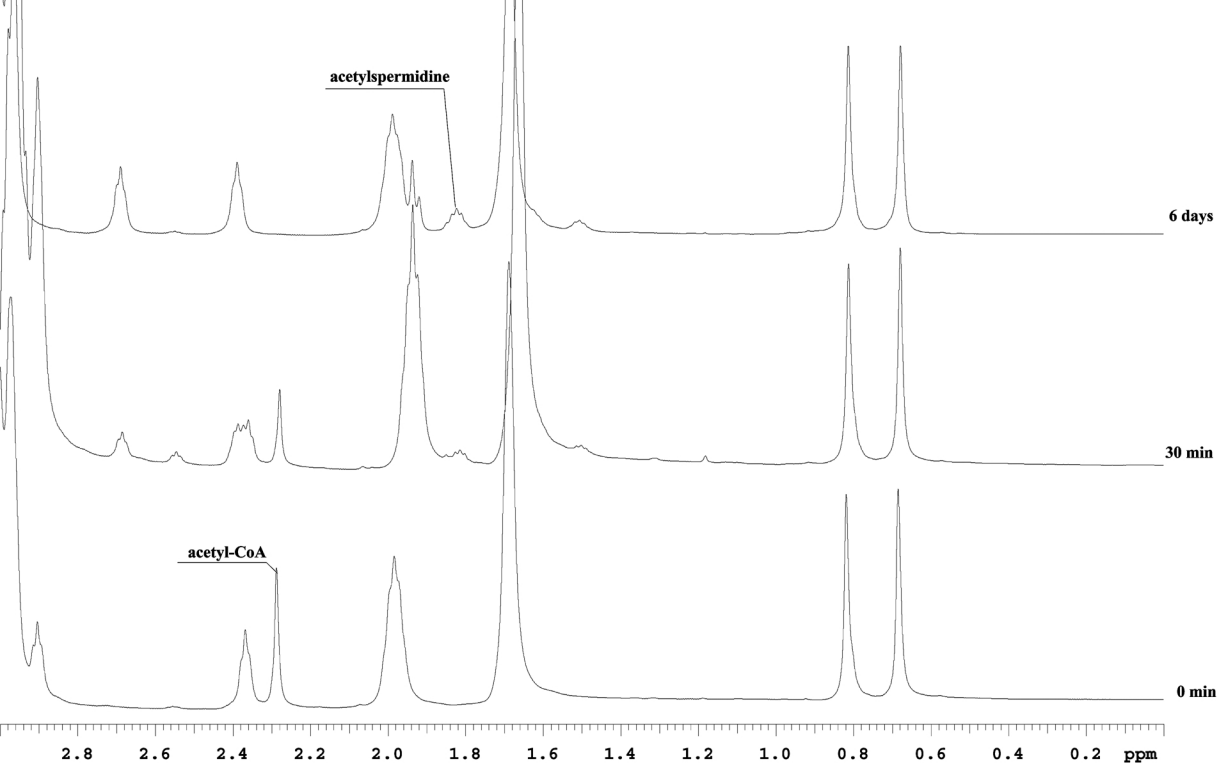

Supplement: NIHMS326745-supplement-Filippova_PaiA_SupMat.pdf [file NIHMS326745-supplement-Filippova_PaiA_SupMat.pdf]
